# Supplementary material for: Perceived Psychological Restorativeness in Relation to Individual and Environmental Variables: A Study Conducted at Poetto Beach in Sardinia, Italy
Source: MDPI journal article supplement (doi:10.3390/su15032794), 2023-02-03
Supplement: s1 [file s1]

## **Supplemental Material**

**for**

**Perceived Psychological Restorativeness in Relation to Individual and Environmental**

**Variables: A Study Conducted at Poetto Beach in Sardinia, Italy**

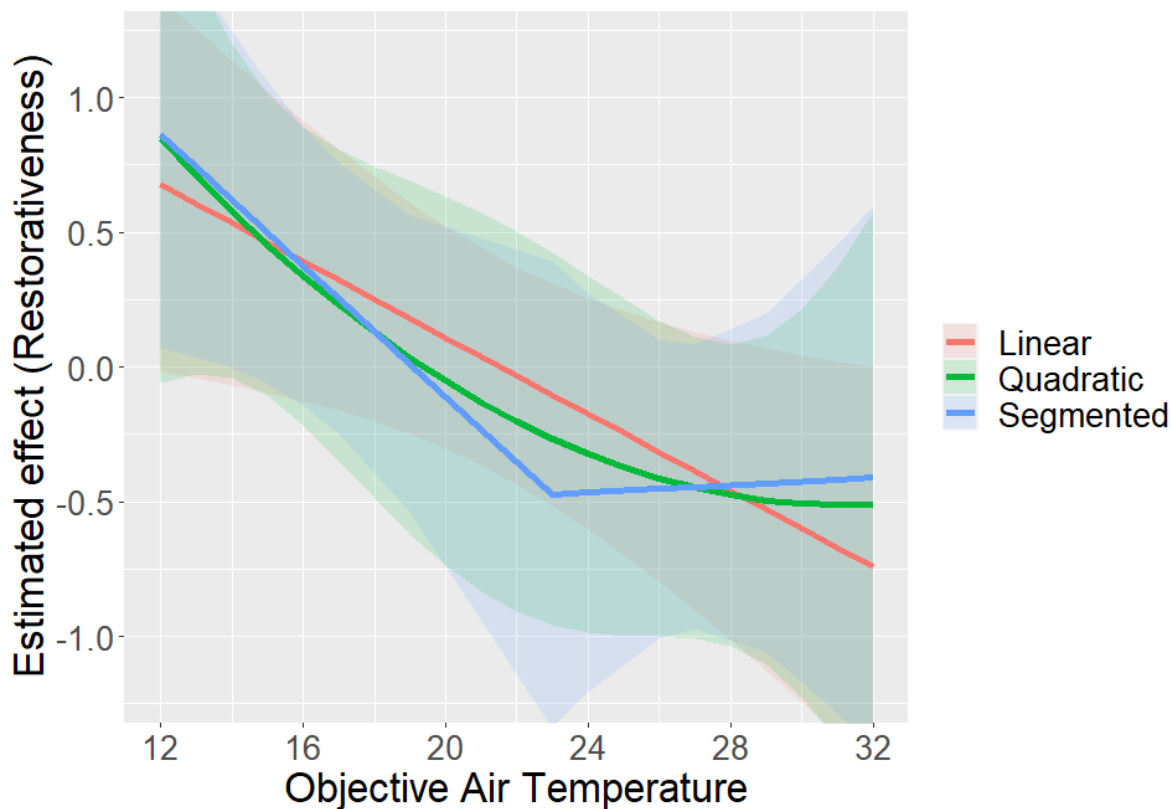

**Figure S1.** Plot of linear (best fit), quadratic, and segmented regression of Restorativeness on Objective Air Temperature.

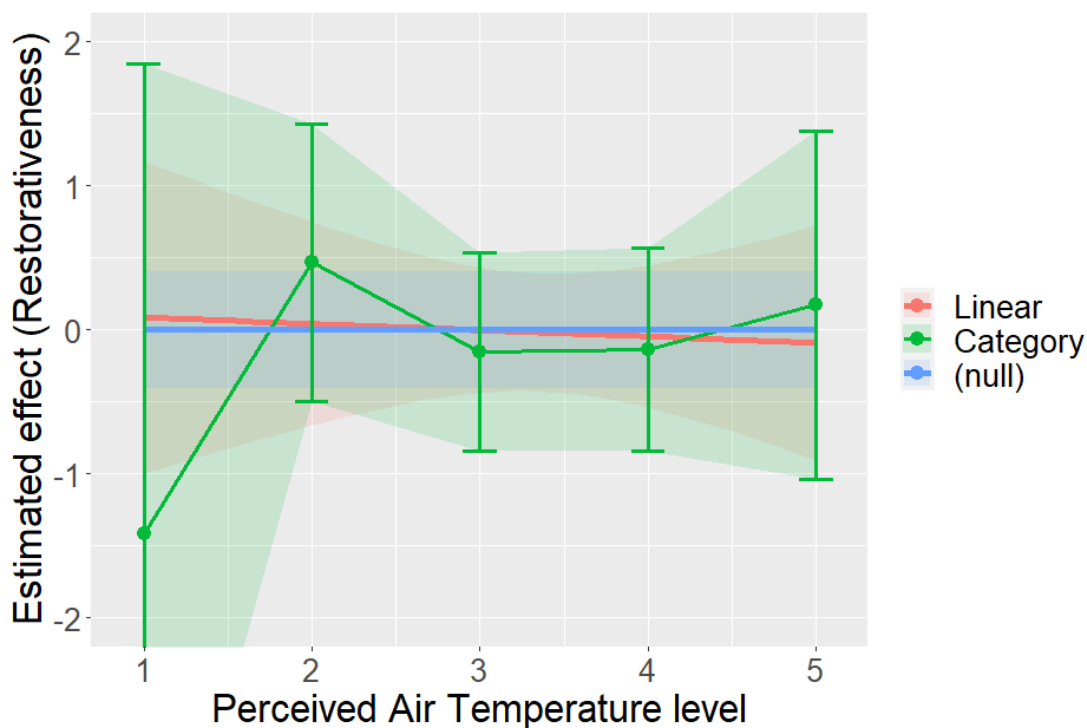

**Figure S2.** Plot of regression of Restorativeness on Objective Air Temperature with the latter being treated as a linear or category/unordered predictor, as well as a null model including only a constant intercept term (which showed the best fit).

**Università degli Studi di Padova – Scuola di Psicologia – Dipartimento  
di Psicologia Generale**  
**Relazione tra condizioni climatiche oggettive e rigeneratività percepita  
in ambienti marini**

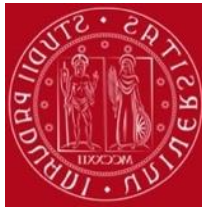

**INFORMAZIONI GENERALI**

1. Sesso:    ☐ Maschio        ☐ Femmina

2. Età: \_\_\_\_\_

3. Indicativamente, da quanto tempo frequenta il Poetto?

☐ Un mese    ☐ Un anno circa    ☐ Più di 5 anni

4. Con quante persone è venuto oggi in spiaggia?

☐ Da solo/a    ☐ Con una persona    ☐ Con più di una persona

5. Con che frequenza settimanale visita questa spiaggia?

☐ Meno di una volta a settimana    ☐ Una volta a settimana    ☐ Due volte a settimana

☐ Più di due volte a settimana    ☐ Ogni giorno

**1. SPIAGGIA:**

1. Per quanto tempo rimarrà in spiaggia oggi?

☐ Meno di 1 ora        ☐ 1 – 2 ore        ☐ 2 – 4 ore        ☐ Più di 4 ore

2. Quali attività ha svolto o svolgerà in spiaggia oggi? (Contrassegni le risposte più adatte alle sue attività che svolgerà o ha svolto oggi in spiaggia.)

- |                                                         |                                           |                                               |                                                      |
|---------------------------------------------------------|-------------------------------------------|-----------------------------------------------|------------------------------------------------------|
| <input type="checkbox"/> Relax                          | <input type="checkbox"/> Meditazione      | <input type="checkbox"/> Passeggiare          | <input type="checkbox"/> Volleyball                  |
| <input type="checkbox"/> Socializzare                   | <input type="checkbox"/> Studiare         | <input type="checkbox"/> Pescare              | <input type="checkbox"/> Jogging/Correre             |
| <input type="checkbox"/> Prendere il sole               | <input type="checkbox"/> Ascoltare musica | <input type="checkbox"/> Wind surfing         | <input type="checkbox"/> Fotografia                  |
| <input type="checkbox"/> Fare sport                     |                                           | <input type="checkbox"/> Sub                  | <input type="checkbox"/> Andare in bicicletta        |
| <input type="checkbox"/> Pausa pranzo                   |                                           | <input type="checkbox"/> Kayaking/surf ski    | <input type="checkbox"/> Giocare con le<br>racchette |
| <input type="checkbox"/> Stare a contatto con la natura |                                           | <input type="checkbox"/> Nuotare              | <input type="checkbox"/> Giocare a calcio            |
| <input type="checkbox"/> Partecipare a qualche evento   |                                           | <input type="checkbox"/> Surfing/skimboarding |                                                      |
|                                                         |                                           | <input type="checkbox"/> Altro: _____         |                                                      |

**2. AFFOLLAMENTO E CONDIZIONI METEOREOLOGICHE:**

1. Approssimativamente, quante persone (in NUMERO) vede intorno a lei in questo momento dal punto in cui si trova? \_\_\_\_\_

2. Secondo la sua percezione la spiaggia è:

☐ Per nulla affollata   ☐ Poco affollata   ☐ Mediamente affollata   ☐ Molto affollata

3. Selezioni la casella che descrive meglio il tempo di oggi:

|                               |                                       |                                             |                                                 |                                                      |                                          |                                            |
|-------------------------------|---------------------------------------|---------------------------------------------|-------------------------------------------------|------------------------------------------------------|------------------------------------------|--------------------------------------------|
| <b>Temperatura dell'aria</b>  | Non lo so<br><input type="checkbox"/> | Molto freddo<br><input type="checkbox"/>    | Freddo<br><input type="checkbox"/>              | Né caldo né freddo<br><input type="checkbox"/>       | Caldo<br><input type="checkbox"/>        | Molto caldo<br><input type="checkbox"/>    |
| <b>Temperatura dell'acqua</b> | Non lo so<br><input type="checkbox"/> | Molto freddo<br><input type="checkbox"/>    | Freddo<br><input type="checkbox"/>              | Né caldo né freddo<br><input type="checkbox"/>       | Caldo<br><input type="checkbox"/>        | Molto caldo<br><input type="checkbox"/>    |
| <b>Vento</b>                  | Non lo so<br><input type="checkbox"/> | Niente vento<br><input type="checkbox"/>    | Brezza leggera<br><input type="checkbox"/>      | Leggero<br><input type="checkbox"/>                  | Medio<br><input type="checkbox"/>        | Forte<br><input type="checkbox"/>          |
| <b>Copertura nuvole</b>       | Non lo so<br><input type="checkbox"/> | 0%<br><input type="checkbox"/>              | 25%<br><input type="checkbox"/>                 | 50%<br><input type="checkbox"/>                      | 75%<br><input type="checkbox"/>          | 100%<br><input type="checkbox"/>           |
| <b>Qualità dell'aria</b>      | Non lo so<br><input type="checkbox"/> | Molto inquinata<br><input type="checkbox"/> | Inquinata<br><input type="checkbox"/>           | Né inquinata, né pulita<br><input type="checkbox"/>  | Pulita<br><input type="checkbox"/>       | Molto pulita<br><input type="checkbox"/>   |
| <b>Qualità dell'acqua</b>     | Non lo so<br><input type="checkbox"/> | Molto inquinata<br><input type="checkbox"/> | Inquinata<br><input type="checkbox"/>           | Né inquinata, né pulita<br><input type="checkbox"/>  | Pulita<br><input type="checkbox"/>       | Molto pulita<br><input type="checkbox"/>   |
| <b>Umidità</b>                | Non lo so<br><input type="checkbox"/> | Forte umidità<br><input type="checkbox"/>   | Umidità percepibile<br><input type="checkbox"/> | Né poca né molta umidità<br><input type="checkbox"/> | Poca umidità<br><input type="checkbox"/> | Niente umidità<br><input type="checkbox"/> |

**Figure S3.** Questionnaire. The examples include some items of the following parts: “General Information and Visiting Experience” and “Questions About the Perception of Environmental Conditions at Poetto Beach”.
